# Supplementary material for: Association of egg consumption with colorectal polyp prevalence: findings from the Lanxi Pre-Colorectal Cancer Cohort (LP3C) in China
Source: Royal Society of Chemistry journal article supplement (doi:10.1039/d2fo03061f), 2023-01-01
Supplement: d2fo03061f1.pdf [file d2fo03061f1.pdf]

## *Supplementary Material*

### **Table of Contents**

- Table S1** Pearson's correlation of food groups intake derived from a FFQ survey and two 24-h dietary recalls among 200 Chinese from LP3C
- Table S2** The definition of healthy diet score in the Lanxi Pre-Colorectal Cancer Cohort (LP3C)
- Table S3** Multivariable-adjusted ORs (95% CIs) of egg consumption with the prevalence of polyps according to sizes
- Table S4** Multivariable-adjusted ORs (95% CIs) of egg consumption with the prevalence of polyps according to polyp numbers
- Table S5** Sensitivity analyses for multivariable-adjusted ORs (95% CIs) of egg consumption with the prevalence of polyps
- Table S6** Subgroup analyses for multivariable-adjusted ORs (95% CIs) of egg consumption with the prevalence of polyps
- Table S7** Multivariable-adjusted ORs (95% CIs) of dietary nutrient with risk of colorectal polyps
- Table S8** Multivariable-adjusted ORs (95% CIs) of egg consumption (per 1 g · 2000 kcal<sup>-1</sup> · d<sup>-1</sup>) with the prevalence of colorectal polyps in the LP3C study

**Table S1 Pearson's correlation of food groups intake derived from a FFQ survey and two 24-h dietary recalls among 200 Chinese from LP3C**

|                     | FFQ VS 1st<br>24-h recall | P-value | FFQ VS 2nd<br>24-h recall | P-value | FFQ VS average<br>of 24-h recalls | P-value |
|---------------------|---------------------------|---------|---------------------------|---------|-----------------------------------|---------|
| Total energy intake | 0.5                       | <0.001  | 0.5                       | <0.001  | 0.6                               | <0.001  |
| Rice                | 0.5                       | <0.001  | 0.4                       | <0.001  | 0.5                               | <0.001  |
| Fish                | 0.3                       | <0.001  | 0.4                       | <0.001  | 0.5                               | <0.001  |
| Beverage            | 0.3                       | <0.001  | 0.5                       | <0.001  | 0.5                               | <0.001  |
| Egg                 | 0.3                       | <0.001  | 0.3                       | <0.001  | 0.4                               | <0.001  |
| Vegetables          | 0.3                       | <0.001  | 0.3                       | <0.001  | 0.4                               | <0.001  |
| Fruit               | 0.5                       | <0.001  | 0.2                       | <0.001  | 0.4                               | <0.001  |
| Milk products       | 0.4                       | <0.001  | 0.4                       | <0.001  | 0.4                               | <0.001  |
| Tea                 | 0.4                       | <0.001  | 0.4                       | <0.001  | 0.4                               | <0.001  |
| Alcohol             | 0.3                       | <0.001  | 0.4                       | <0.001  | 0.4                               | <0.001  |
| Red meat            | 0.3                       | <0.001  | 0.3                       | <0.001  | 0.3                               | <0.001  |
| Poultry             | 0.2                       | 0.004   | 0.2                       | 0.01    | 0.3                               | <0.001  |

**Table S2 The definition of healthy diet score in the Lanxi Pre-Colorectal Cancer Cohort (LP3C)***a*

| Item                 | Intake median (g · 2000 kcal <sup>-1</sup> · d <sup>-1</sup> ) | Score criteria | Score |
|----------------------|----------------------------------------------------------------|----------------|-------|
| Wholegrain           | 1.8                                                            | ≥median        | 1     |
|                      |                                                                | <median        | 0     |
| Refined grain        | 408.3                                                          | ≥median        | 0     |
|                      |                                                                | <median        | 1     |
| Fruits               | 68.6                                                           | ≥median        | 1     |
|                      |                                                                | <median        | 0     |
| Fresh vegetables     | 217.8                                                          | ≥median        | 1     |
|                      |                                                                | <median        | 0     |
| Seafood              | 10.8                                                           | ≥median        | 1     |
|                      |                                                                | <median        | 0     |
| Unprocessed red meat | 50.8                                                           | ≥median        | 0     |
|                      |                                                                | <median        | 1     |
| Processed red meat   | 0                                                              | ≥median        | 0     |
|                      |                                                                | <median        | 1     |
| Milk or yogurt       | 0                                                              | ≥median        | 1     |
|                      |                                                                | <median        | 0     |
| Tea                  | 0                                                              | ≥median        | 1     |
|                      |                                                                | <median        | 0     |
| Preserved vegetables | 0.7                                                            | ≥median        | 0     |
|                      |                                                                | <median        | 1     |

*a* The details of the score were shown as follows: wholegrain intake (≥median), refined grain intake (<median), seafood intake (≥median), unprocessed red meat intake (<median), processed red meat intake (<median), fruit intake (≥median), vegetable intake (≥median), preserved vegetable intake (<median), milk products (milk or yogurt) intake (≥median), and tea intake (≥median). Each beneficial diet factor could get one point and the total score was defined as the sum of 10 important food scores. The range of healthy diet scores was from 0 to 10.

**Table S3 Multivariable-adjusted ORs (95% CIs) of egg consumption with risk of polyps according to sizes <sup>a</sup>**

| Egg consumption           | Size   |                 |        |                 |
|---------------------------|--------|-----------------|--------|-----------------|
|                           | <10 mm |                 | ≥10 mm |                 |
|                           | Cases  | OR (95% CI)     | Cases  | OR (95% CI)     |
| Q1                        | 410    | 1 (ref)         | 64     | 1 (ref)         |
| Q2                        | 460    | 1.16(0.98-1.36) | 71     | 1.17(0.82-1.66) |
| Q3                        | 444    | 1.14(0.97-1.34) | 86     | 1.45(1.03-2.04) |
| Q4                        | 451    | 1.21(1.02-1.43) | 78     | 1.40(0.98-1.99) |
| <i>P</i> <sub>trend</sub> |        | 0.04            |        | 0.03            |

<sup>a</sup>Q, quartile; OR, odds ratio; CI, confidence interval; Multivariable-adjusted was adjusted for age, sex, BMI (<18.5, 18.5-23.9, 24-27.9, ≥28, in kg/m<sup>2</sup>), smoking (never, past smokers with <25 pack-years or ≥25 pack-years, or current smokers with <25 pack-years or ≥25 pack-years), alcohol consumption (never, ≤25 mL for men and ≤15 mL for women, or >25 mL for men and >15 mL for women), household annual income (yuan), physical activity (quartile), vitamin supplement use (yes or no), family history of colorectal cancer (yes or no), total energy intake (quartile), and healthy diet score (quartile).

**Table S4 Multivariable-adjusted ORs (95% CIs) of egg consumption with risk of polyps according to polyp numbers <sup>a</sup>**

| Egg consumption           | Multiplicity |                 |          |                 |
|---------------------------|--------------|-----------------|----------|-----------------|
|                           | Single       |                 | Multiple |                 |
|                           | Cases        | OR (95% CI)     | Cases    | OR (95% CI)     |
| Q1                        | 367          | 1 (ref)         | 107      | 1 (ref)         |
| Q2                        | 385          | 1.09(0.92-1.29) | 146      | 1.40(1.07-1.83) |
| Q3                        | 387          | 1.12(0.94-1.33) | 143      | 1.42(1.08-1.86) |
| Q4                        | 402          | 1.19(1.00-1.41) | 127      | 1.40(1.05-1.86) |
| <i>P</i> <sub>trend</sub> |              | 0.05            |          | 0.03            |

<sup>a</sup> Q, quartile; OR, odds ratio; CI, confidence interval; Multivariable-adjusted was adjusted for age, sex, BMI (<18.5, 18.5-23.9, 24-27.9, ≥28, in kg/m<sup>2</sup>), smoking (never, past smokers with <25 pack-years or ≥25 pack-years, or current smokers with <25 pack-years or ≥25 pack-years), alcohol consumption (never, ≤25 mL for men and ≤15 mL for women, or >25 mL for men and >15 mL for women), household annual income (yuan), physical activity (quartile), vitamin supplement use (yes or no), family history of colorectal cancer (yes or no), total energy intake (quartile), and healthy diet score (quartile).

**Table S5 Multivariable-adjusted ORs (95% CIs) of egg consumption with risk of polyps for sensitivity analysis <sup>a</sup>**

|                                                            | Cases/n    | Quartiles of egg consumption (g · 2000 kcal <sup>-1</sup> · d <sup>-1</sup> ) |                 |                 |                 | <i>P</i> <sub>trend</sub> |
|------------------------------------------------------------|------------|-------------------------------------------------------------------------------|-----------------|-----------------|-----------------|---------------------------|
|                                                            |            | Q1                                                                            | Q2              | Q3              | Q4              |                           |
| Excluding persons with history of cancer                   | 2040/6702  | 1 (ref)                                                                       | 1.15(0.99-1.35) | 1.18(1.01-1.38) | 1.24(1.06-1.46) | 0.01                      |
| Excluding persons with extreme BMIs                        | 1993/6492  | 1 (ref)                                                                       | 1.19(1.01-1.39) | 1.24(1.05-1.45) | 1.27(1.08-1.50) | 0.003                     |
| Excluding persons with extreme energy <sup>b</sup>         | 2018/6682  | 1 (ref)                                                                       | 1.16(0.99-1.36) | 1.17(0.99-1.36) | 1.23(1.05-1.44) | 0.02                      |
| Excluding persons with extreme egg consumption             | 1665/ 5377 | 1 (ref)                                                                       | 1.18(0.99-1.42) | 1.21(1.01-1.45) | 1.26(1.02-1.55) | 0.04                      |
| Excluding persons with family history of colorectal cancer | 1919/6315  | 1 (ref)                                                                       | 1.13(0.96-1.33) | 1.16(0.99-1.36) | 1.20(1.02-1.41) | 0.03                      |
| Further adjustment for calcium supplement use              | 2064/6783  | 1 (ref)                                                                       | 1.16(0.99-1.35) | 1.18(1.01-1.38) | 1.23(1.05-1.44) | 0.01                      |
| Further adjustment for aspirin use                         | 2064/6783  | 1 (ref)                                                                       | 1.15(0.99-1.34) | 1.18(1.01-1.38) | 1.23(1.04-1.44) | 0.01                      |
| Further adjustment for education level                     | 2064/6783  | 1 (ref)                                                                       | 1.15(0.99-1.34) | 1.17(1.00-1.37) | 1.21(1.03-1.42) | 0.02                      |
| Further adjustment for dietary cholesterol                 | 2064/6783  | 1 (ref)                                                                       | 1.13(0.97-1.32) | 1.12(0.94-1.33) | 1.09(0.87-1.37) | 0.37                      |

<sup>a</sup> Q, quartile; <sup>b</sup> Extreme energy: Males: <800 kcal/d or >4200 kcal/d and females: <600 kcal/d or >3500 kcal/d; Multivariable-adjusted was adjusted for age, sex, BMI (<18.5, 18.5-23.9, 24-27.9, ≥28, in kg/m<sup>2</sup>), smoking (never, past smokers with <25 pack-years or ≥25 pack-years, or current smokers with <25 pack-years or ≥25 pack-years), alcohol consumption (never, ≤25 mL for men and ≤15 mL for women, or >25 mL for men and >15 mL for women), household annual income (yuan), physical activity (quartile), vitamin supplement use (yes or no), family history of colorectal cancer (yes or no), total energy intake (quartile), and healthy diet score (quartile).

**Table S6 Multivariable-adjusted ORs (95% CIs) of egg consumption with risk of polyps for subgroup analysis <sup>a</sup>**

| Subgroups                      | Cases/n   | Quartiles of egg consumption (g · 2000 kcal <sup>-1</sup> · d <sup>-1</sup> ) |                 |                 |                 | <i>P</i> <sub>trend</sub> | <i>P</i> <sub>interaction</sub> |
|--------------------------------|-----------|-------------------------------------------------------------------------------|-----------------|-----------------|-----------------|---------------------------|---------------------------------|
|                                |           | Q1                                                                            | Q2              | Q3              | Q4              |                           |                                 |
| <b>Age</b>                     |           |                                                                               |                 |                 |                 |                           |                                 |
| <60 y                          | 786/3344  | 1 (ref)                                                                       | 1.13(0.89-1.45) | 1.28(1.00-1.64) | 1.35(1.05-1.74) | 0.01                      | 0.58                            |
| ≥60 y                          | 1278/3439 | 1 (ref)                                                                       | 1.21(0.99-1.48) | 1.13(0.92-1.39) | 1.18(0.96-1.45) | 0.20                      |                                 |
| <b>Sex</b>                     |           |                                                                               |                 |                 |                 |                           |                                 |
| Men                            | 1391/3498 | 1 (ref)                                                                       | 1.15(0.94-1.40) | 1.17(0.96-1.43) | 1.26(1.02-1.55) | 0.04                      | 0.78                            |
| Women                          | 673/3285  | 1 (ref)                                                                       | 1.15(0.89-1.47) | 1.23(0.96-1.58) | 1.21(0.94-1.55) | 0.11                      |                                 |
| <b>BMI</b>                     |           |                                                                               |                 |                 |                 |                           |                                 |
| <24                            | 1118/3993 | 1 (ref)                                                                       | 1.05(0.86-1.30) | 1.08(0.88-1.33) | 1.19(0.96-1.47) | 0.11                      | 0.90                            |
| ≥24                            | 946/2790  | 1 (ref)                                                                       | 1.30(1.03-1.64) | 1.30(1.03-1.65) | 1.27(1.00-1.63) | 0.06                      |                                 |
| <b>Physical activity</b>       |           |                                                                               |                 |                 |                 |                           |                                 |
| <Median                        | 1082/3381 | 1 (ref)                                                                       | 0.98(0.78-1.22) | 1.08(0.86-1.35) | 1.15(0.92-1.43) | 0.14                      | 0.35                            |
| ≥Median                        | 982/3402  | 1 (ref)                                                                       | 1.33(1.08-1.65) | 1.27(1.02-1.59) | 1.31(1.04-1.65) | 0.03                      |                                 |
| <b>Smoking</b>                 |           |                                                                               |                 |                 |                 |                           |                                 |
| Nonsmoker                      | 1082/4451 | 1 (ref)                                                                       | 1.09(0.89-1.34) | 1.15(0.94-1.41) | 1.19(0.97-1.46) | 0.08                      | 0.78                            |
| Former/current smoker          | 982/2332  | 1 (ref)                                                                       | 1.26(0.99-1.60) | 1.25(0.97-1.59) | 1.30(1.01-1.68) | 0.05                      |                                 |
| <b>Alcohol consumption</b>     |           |                                                                               |                 |                 |                 |                           |                                 |
| Nondrinker                     | 1010/3729 | 1 (ref)                                                                       | 1.13(0.91-1.40) | 1.19(0.96-1.48) | 1.25(1.01-1.55) | 0.04                      | 0.88                            |
| Drinker                        | 1054/3054 | 1 (ref)                                                                       | 1.19(0.95-1.49) | 1.19(0.95-1.48) | 1.23(0.97-1.56) | 0.11                      |                                 |
| <b>Healthy diet score</b>      |           |                                                                               |                 |                 |                 |                           |                                 |
| <Median                        | 935/3025  | 1 (ref)                                                                       | 1.15(0.93-1.43) | 1.13(0.90-1.42) | 1.22(0.96-1.54) | 0.12                      | 0.88                            |
| ≥Median                        | 1129/3758 | 1 (ref)                                                                       | 1.17(0.93-1.46) | 1.24(0.99-1.54) | 1.28(1.03-1.59) | 0.03                      |                                 |
| <b>Healthy lifestyle score</b> |           |                                                                               |                 |                 |                 |                           |                                 |
| <Median                        | 599/1759  | 1 (ref)                                                                       | 1.29(0.97-1.70) | 1.24(0.93-1.66) | 1.17(0.87-1.59) | 0.29                      | 0.68                            |

≥Median                      1465/5024      1 (ref)      1.10(0.91-1.33)      1.16(0.96-1.39)      1.24(1.03-1.50)      0.02

<sup>a</sup>Q, quartile; OR, odds ratio; CI, confidence interval; Multivariable-adjusted was adjusted for age, sex, BMI (<18.5, 18.5-23.9, 24-27.9, ≥28, in kg/m<sup>2</sup>), smoking (never, past smokers with <25 pack-years or ≥25 pack-years, or current smokers with <25 pack-years or ≥25 pack-years), alcohol consumption (never, ≤25 mL for men and ≤15 mL for women, or >25 mL for men and >15 mL for women), household annual income (yuan), physical activity (quartile), vitamin supplement use (yes or no), family history of colorectal cancer (yes or no), total energy intake (quartile), and healthy diet score (quartile).

---



**Table S7 Multivariable-adjusted ORs (95% CIs) of dietary nutrient with risk of colorectal polyps**

|                              | Quartiles of dietary nutrient |                  |                  |                  | <i>p</i> trend |
|------------------------------|-------------------------------|------------------|------------------|------------------|----------------|
|                              | Q1                            | Q2               | Q3               | Q4               |                |
| Dietary cholesterol (mg)     | <111.4                        | 111.5-197.7      | 197.8-351.0      | >351.1           |                |
| Cases/n                      | 451/1695                      | 494/1696         | 555/1696         | 564/1696         |                |
| Multivariable-adjusted model | 1 (ref)                       | 1.11 (0.94-1.32) | 1.24 (1.04-1.49) | 1.21 (0.99-1.47) | 0.04           |

Multivariable-adjusted model was adjusted age, sex, BMI (<18.5, 18.5-23.9, 24-27.9, >28, in kg/m<sup>2</sup>), smoking (never, past smokers with <25 pack-years or ≥25 pack-years, current smokers with <25 pack-years or ≥25 pack-years), alcohol consumption (never, ≤25 ml for men and ≤ 15 ml for women, >25 ml for men and >15 ml for women), household annual income (yuan), physical activity (quartile), vitamin supplement use (yes or no), family history of colorectal cancer (yes or no),total energy intake (quartile), dietary fiber intake(quartile), dietary fat intake(quartile), dietary protein intake(quartile).

**Table S8 Multivariable-adjusted ORs (95% CIs) of egg consumption (per 50 g · 2000 kcal<sup>-1</sup> · d<sup>-1</sup>) with the prevalence of colorectal polyps in the LP3C study**

|                      | Egg consumption (per 50 g · 2000 kcal <sup>-1</sup> · d <sup>-1</sup> ) | P-value |
|----------------------|-------------------------------------------------------------------------|---------|
| Model 1 <sup>a</sup> | 1.08 (0.99-1.19)                                                        | 0.08    |
| Model 2 <sup>b</sup> | 1.08 (0.99-1.18)                                                        | 0.10    |
| Model 3 <sup>c</sup> | 1.08 (1.00-1.20)                                                        | 0.06    |
| Model 4 <sup>d</sup> | 1.09 (1.00-1.20)                                                        | 0.06    |
| Model 5 <sup>e</sup> | 1.11 (1.01-1.21)                                                        | 0.04    |

<sup>a</sup> Model 1 was adjusted for age and sex; <sup>b</sup> Model 2 was adjusted for age, sex and household annual income (yuan); <sup>c</sup> Model 3 was adjusted for age, sex, household annual income (yuan), smoking (never, past smokers with <25 pack-years or ≥25 pack-years, current smokers with <25 pack-years or ≥25 pack-years), alcohol consumption (never, ≤25 mL for men and ≤ 15 mL for women, >25 mL for men and >15 mL for women), physical activity (quartile), vitamin supplement use (yes or no), BMI (<18.5, 18.5-23.9, 24-27.9, ≥28, in kg/m<sup>2</sup>) and family history of colorectal cancer (yes or no); <sup>d</sup> Model 4: Model 3 + total energy intake (quartile), intake of fruits (quartile), fresh vegetables (quartile), beans (quartile), total dairy products (quartile), unprocessed red meat (quartile), processed red meat (quartile), seafoods (quartile), and poultry (quartile); <sup>e</sup> Model 5: Model 3 + total energy intake (quartile), and healthy diet score (quartile).
